# Supplementary material for: Pillared-bilayer porous coordination polymers of Zn(ii): enhanced hydrophobicity of pore surface by changing the pillar functionality
Source: Royal Society of Chemistry journal article supplement (doi:10.1039/c5ce00143a), 2015-01-01
Supplement: c5ce00143a1.pdf [file c5ce00143a1.pdf]

**Electronic Supporting Informations**

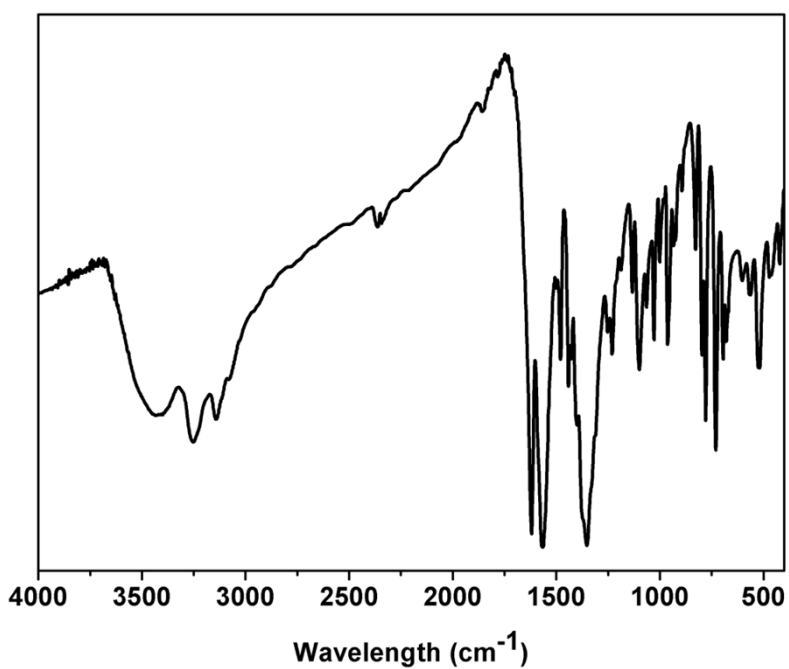

**Fig. S1** IR spectrum for compound 1.

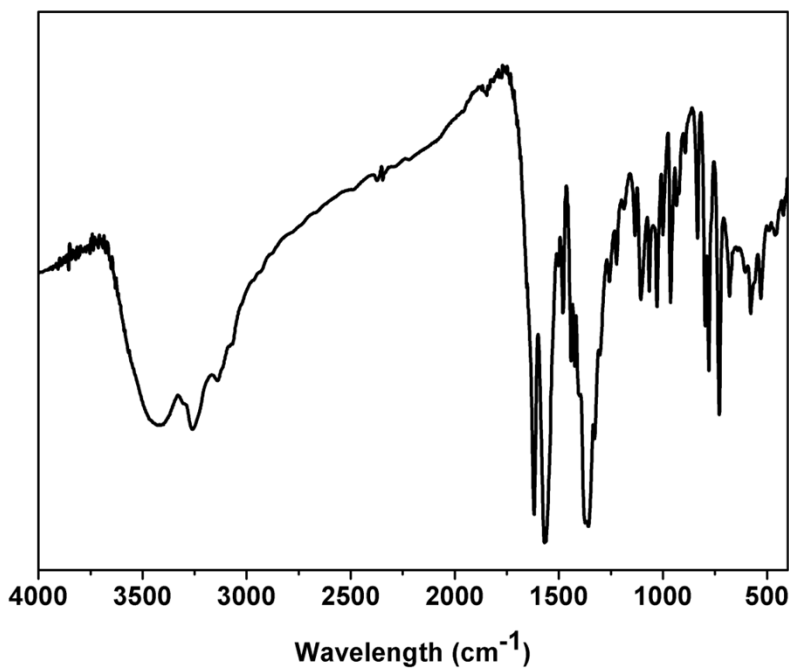

**Fig. S2** IR spectrum for compound 2.

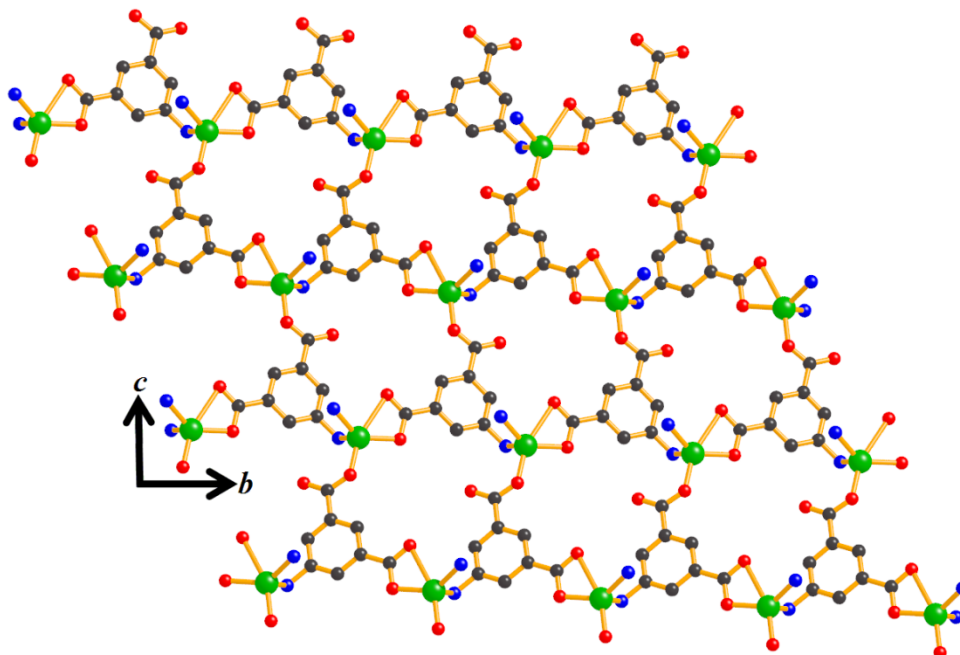

**Fig. S3** View of the 2D [Zn(NH<sub>2</sub>-bdc)]<sub>n</sub> sheet of **2** in the crystallographic *bc* plane.

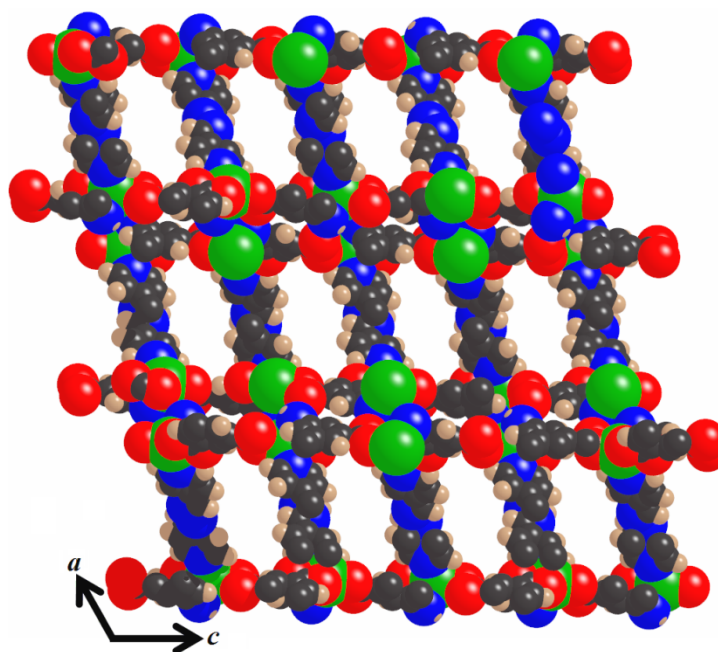

**Fig. S4** Space-filling model showing one dimensional channel ( $8.3 \times 3.8 \text{ \AA}^2$ ) along the crystallographic *b* axis in **1**. Guest water molecules have been removed for clarity.

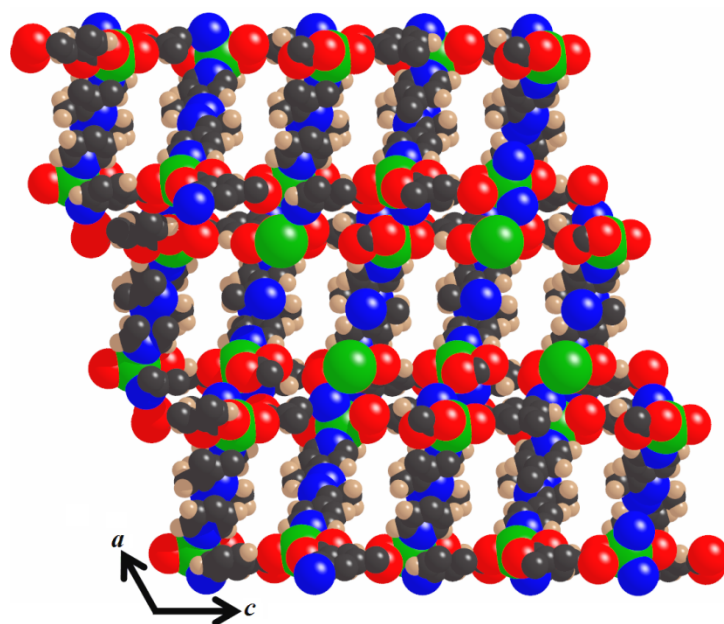

**Fig. S5** Space-filling model showing one dimensional channel ( $8.0 \times 1.6 \text{ \AA}^2$ ) along the crystallographic  $b$ -axis **2**. Guest water molecules have been removed for clarity.

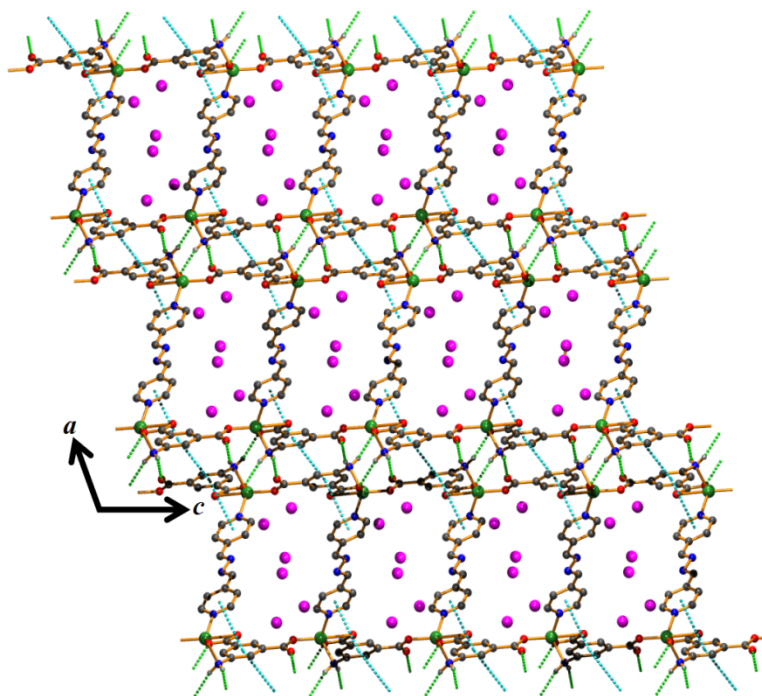

**Fig. S6** View of the 3D supramolecular framework structure of **1** ( $\pi$ - $\pi$  interactions: Cyan dotted lines and H-bonding: Green dotted lines) along the crystallographic  $b$ -axis.

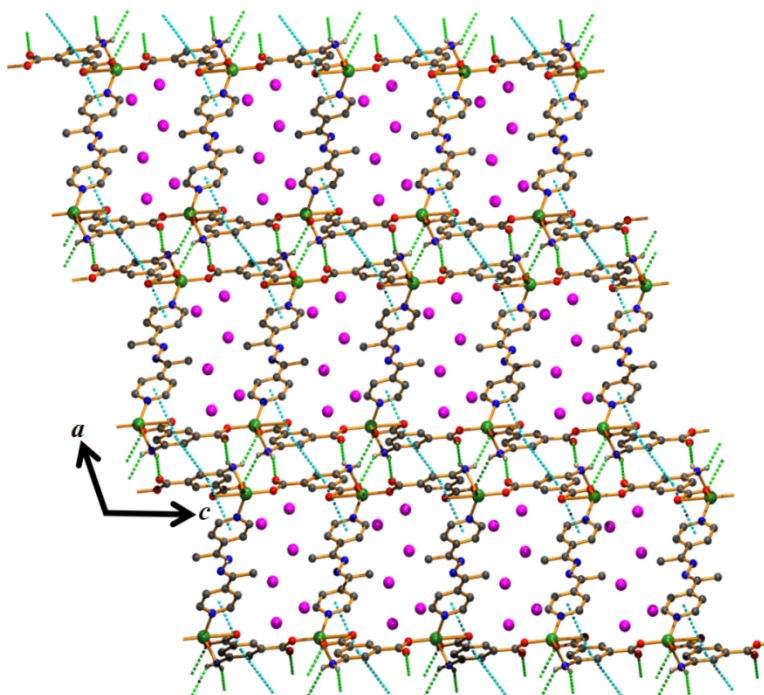

**Fig. S7** View of the 3D supramolecular framework structure of **2** ( $\pi$ - $\pi$  interactions: Cyan dotted lines and H-bonding: Green dotted lines) along the crystallographic  $b$ -axis.

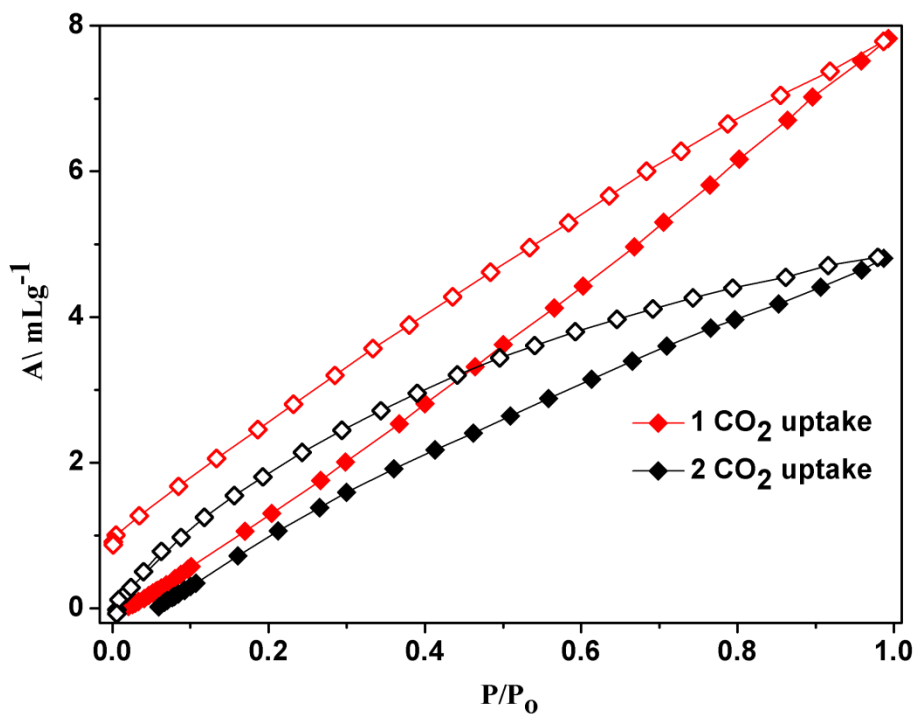

**Fig. S8** CO<sub>2</sub> adsorption isotherms for **1** and **2** at 298 K: adsorption (filled circles), desorption (open circles).
